# Supplementary material
Source: MDPI journal article supplement (https://www.mdpi.com/1424-2818/16/2/94)
Supplement: s1 [file s1]

**Table S2.** Performance metrics for parameter settings used for creating the present time model and relative contribution (%) of variables.

| Variable                                    | <i>cf. bedriagae</i> | <i>kurtmuelleri</i> | <i>ridibundus</i> |
|---------------------------------------------|----------------------|---------------------|-------------------|
| Partial ROC*                                | 0 (0)                | 0 (0)               | 0 (0)             |
| Omission rate 5%*                           | 0.053 (0.042)        | 0.286 (0.267)       | 0.089 (0.044)     |
| AICc*                                       | 7176 (7500)          | 818 (847)           | 5691 (5865)       |
| Delta AICc*                                 | 0 (0)                | 0 (0)               | 0 (0)             |
| Regularization multiplier*                  | 5.0 (2.5)            | 4.5 (3.0)           | 2.5 (3.5)         |
| Response type of feature classes*           | l (lqpth)            | lqt (qth)           | lqh (lqth)        |
| Mean diurnal range (Bio 2)                  | 0.9                  | 0.4                 | 5.2               |
| Temperature seasonality (Bio 4)             | 0.1                  | 4.3                 | 3.7               |
| Mean temperature of wettest quarter (Bio 8) | 11.0                 | 1.5                 | 8.5               |
| Mean temperature of driest quarter (Bio 9)  | 30.6                 | 20.3                | 2.2               |
| Precipitation of driest month (Bio 14)      | 0.3                  | 0                   | 24.4              |
| Precipitation seasonality (Bio 15)          | 1.8                  | 0.4                 | 1.8               |
| Precipitation of coldest quarter (Bio 19)   | 1.9                  | 37.2                | 0.1               |
| Broadleaf forest                            | 0.8                  | 2.9                 | 2.1               |
| Needleleaf forest                           | 3.8                  | 1.8                 | 2.5               |
| Mixed forest                                | 1.4                  | 0.1                 | 3.0               |
| Shrubs                                      | 0.1                  | 2.3                 | 1.4               |
| Barren                                      | 38.7                 | 12.4                | 1.0               |
| Herbaceous vegetation                       | 0.3                  | 5.6                 | 1.7               |
| Cultivated vegetation                       | 0.8                  | 0.2                 | 16.3              |
| Altitude                                    | 1.2                  | 6.2                 | 2.6               |
| Aridity index                               | 1.9                  | 0.6                 | 0.1               |
| Habitat homogeneity                         | 3.4                  | 0.9                 | 20.2              |
| Terrain roughness                           | 0.1                  | 0                   | 0.8               |
| Terrain roughness index                     | 0.1                  | 0                   | 1.3               |
| Tree coverage percent                       | 0.9                  | 2.9                 | 1.1               |

\*With only seven bioclimatic variables (in rounded squares).
